# Supplementary material
Source: publisher figshare collection journal article supplement (https://acs.figshare.com/ndownloader/files/4129945)
Supplement: Supplementary file 1 [file 4129945]

# **Supporting Information**

**for**

**Crystal structure and specific binding mode of sisomicin to the  
bacterial ribosomal decoding site**

Jiro Kondo<sup>\*</sup>, Mai Koganei & Tomoko Kasahara

*Department of Materials and Life Sciences, Faculty of Science and  
Technology, Sophia University, 7-1 Kioi-cho, Chiyoda-ku, 102-8554 Tokyo,  
Japan*

<sup>\*</sup>Corresponding Author: [j.kondo@sophia.ac.jp](mailto:j.kondo@sophia.ac.jp)

**Supplementary Table 1.** Crystallization conditions

| Crystal code                                          | Siso-NH <sub>4</sub> <sup>+</sup> | Siso-Na <sup>+</sup> |
|-------------------------------------------------------|-----------------------------------|----------------------|
| Temperature                                           | 20°C                              | 30°C                 |
| <u>RNA solution (1 <math>\mu</math>l)</u>             |                                   |                      |
| RNA                                                   | 1 mM                              | 1 mM                 |
| Sisomicin sulfate                                     | 2 mM                              | 2 mM                 |
| Sodium cacodylate (pH = 7.0)                          | 50 mM                             | 50 mM                |
| <u>Crystallization solution (1 <math>\mu</math>l)</u> |                                   |                      |
| Sodium cacodylate (pH = 7.0)                          | 50 mM                             | 50 mM                |
| Spermine tetrahydrochloride                           | 1 mM                              | 1 mM                 |
| Ammonium chloride                                     | 750 mM                            | -                    |
| Sodium chloride                                       | -                                 | 100 mM               |
| 2-Methyl-2,4-pentanediol                              | 1%                                | 1%                   |
| <u>Reservoir solution (500 <math>\mu</math>l)</u>     |                                   |                      |
| 2-Methyl-2,4-pentanediol                              | 40%                               | 40%                  |

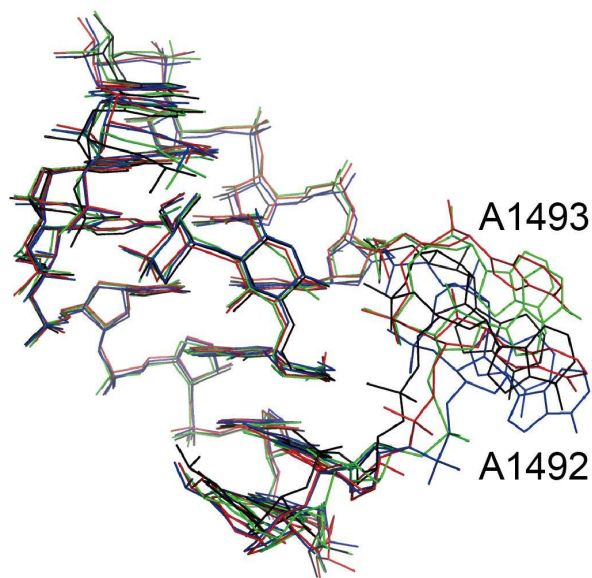**Supplementary Figure 1.** Superimposed tertiary structures of the four independent copies (black, red, blue and green) of the bacterial A site complexed with sisomicin obtained in the present study.

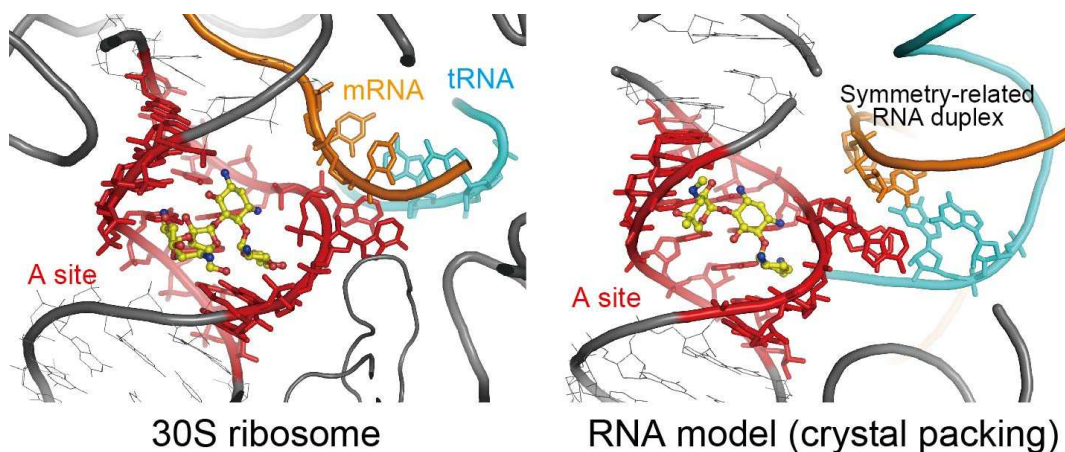

**Supplementary Figure 2.** The A-minor recognition between the bulged-out A1492 and A1493 residues from the A site and the codon-anticodon stem of the tRNA-mRNA complex observed in the 30S ribosomal particles (PDB code: 2J00, left). Crystal packing interactions observed in the present crystal structures mimic the A-minor recognition (right).

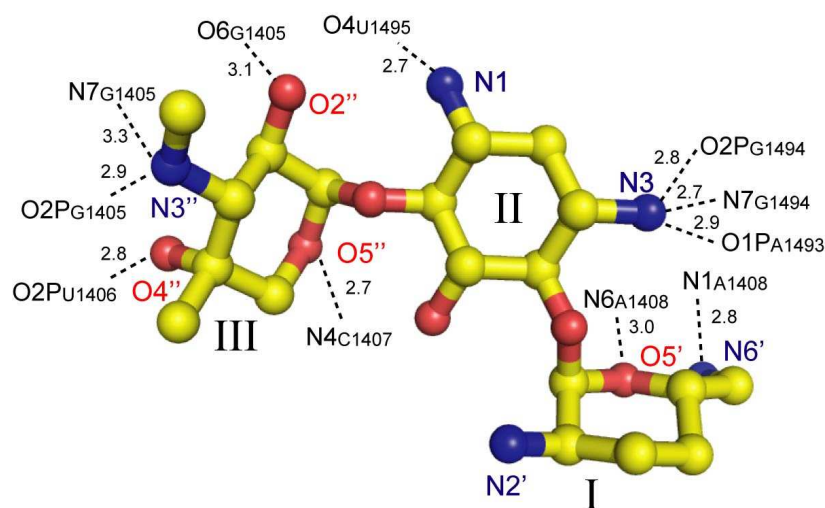

**Supplementary Figure 3.** Detailed interactions of gentamicin C1a with the bacterial A site (PDB code: 2ET3). Hydrogen bonds are represented by dashed lines with distances in Å.
